# Supplementary material for: Differences in Help-Seeking Behavior among University Students during the COVID-19 Pandemic Depending on Mental Health Status: Results from a Cross-Sectional Survey
Source: MDPI journal article supplement (doi:10.3390/bs13110885), 2023-10-25
Supplement: s1 [file s1]

## Supplementary Materials

**Supplementary Table S1.** Descriptives for Suicidal Ideation-Group (n = 1075)

|                        | Mean  | SD   | Min. | Max. |
|------------------------|-------|------|------|------|
| Depressiveness (PHQ-9) | 14.51 | 5.36 | 2    | 27   |
| Anxiety (GAD-7)        | 11.95 | 4.76 | 0    | 21   |
| Alcohol use (AUDIT-C)  | 2.96  | 2.52 | 0    | 11   |
| Loneliness (UCLA)      | 6.92  | 1.79 | 3    | 9    |
| Social Support (ESSI)  | 18.25 | 4.72 | 5    | 25   |
| Stress (PSS-4)         | 9.82  | 2.92 | 0    | 16   |
| Resilience (BRS)       | 2.59  | 0.74 | 1.00 | 5.00 |

*Notes.* SD, standard deviation; Min., minimum value; Max., maximum value; PHQ-9, Patient-Health-Questionnaire-9; GAD-7, Generalized Anxiety Disorder scale; AUDIT-C, Alcohol Use Disorder Identification Test; UCLA 3, 3-item Loneliness Scale; ESSI, ENRICHD Social Support Inventory; PSS-4, Perceived Stress Scale, BRS, Brief Resilience Scale.

**Supplementary Table S2.** Help-seeking intentions for Suicidal Ideation-Group (n = 1075)

|                                         | Mean | SD   | Min. | Max. |
|-----------------------------------------|------|------|------|------|
| Online services                         | 2.11 | 1.10 | 1    | 4    |
| Inpatient treatment                     | 1.82 | 1.02 | 1    | 4    |
| Psychological/psycho-social counselling | 2.74 | 1.10 | 1    | 4    |
| Psychotherapy                           | 3.04 | 1.10 | 1    | 4    |
| Psychiatrist                            | 2.58 | 1.16 | 1    | 4    |

*Notes.* SD, standard deviation; Min., minimum value; Max., maximum value; PHQ-9, Patient-Health-Questionnaire-9; GAD-7, Generalized Anxiety Disorder scale; AUDIT-C, Alcohol Use Disorder Identification Test; UCLA 3, 3-item Loneliness Scale; ESSI, ENRICHD Social Support Inventory; PSS-4, Perceived Stress Scale, BRS, Brief Resilience Scale.

**Supplementary Table S3.** Descriptives for Symptoms-Group (n = 2,428)

|                        | Mean  | SD   | Min. | Max. |
|------------------------|-------|------|------|------|
| Depressiveness (PHQ-9) | 8.78  | 4.66 | 0    | 24   |
| Anxiety (GAD-7)        | 8.49  | 4.54 | 0    | 21   |
| Alcohol use (AUDIT-C)  | 3.91  | 2.36 | 0    | 12   |
| Loneliness (UCLA)      | 5.73  | 1.83 | 3    | 9    |
| Social Support (ESSI)  | 21.01 | 3.79 | 5    | 25   |
| Stress (PSS-4)         | 7.53  | 2.98 | 0    | 16   |
| Resilience (BRS)       | 2.98  | 0.75 | 1.00 | 5.00 |

*Notes.* SD, standard deviation; Min., minimum value; Max., maximum value; PHQ-9, Patient-Health-Questionnaire-9; GAD-7, Generalized Anxiety Disorder scale; AUDIT-C, Alcohol Use Disorder Identification Test; UCLA 3, 3-item Loneliness Scale; ESSI, ENRICHD Social Support Inventory; PSS-4, Perceived Stress Scale, BRS, Brief Resilience Scale.

**Supplementary Table S4.** Help-seeking intentions for Symptoms -Group (n = 2, 428)

|                                         | Mean | SD   | Min. | Max. |
|-----------------------------------------|------|------|------|------|
| Online services                         | 2.19 | 1.11 | 1    | 4    |
| Inpatient treatment                     | 1.59 | 0.87 | 1    | 4    |
| Psychological/psycho-social counselling | 2.91 | 1.03 | 1    | 4    |
| Psychotherapy                           | 2.98 | 1.07 | 1    | 4    |
| Psychiatrist                            | 2.50 | 1.11 | 1    | 4    |

*Notes.* SD, standard deviation; Min., minimum value; Max., maximum value; PHQ-9, Patient-Health-Questionnaire-9; GAD-7, Generalized Anxiety Disorder scale; AUDIT-C, Alcohol Use Disorder Identification Test; UCLA 3, 3-item Loneliness Scale; ESSI, ENRICHD Social Support Inventory; PSS-4, Perceived Stress Scale, BRS, Brief Resilience Scale.

**Supplementary Table S5.** Descriptives for No-Symptoms-Group (n = 1,971)

|                        | Mean  | SD   | Min. | Max. |
|------------------------|-------|------|------|------|
| Depressiveness (PHQ-9) | 4.46  | 2.46 | 0    | 9    |
| Anxiety (GAD-7)        | 4.57  | 2.36 | 0    | 9    |
| Alcohol use (AUDIT-C)  | 1.66  | 1.31 | 0    | 4    |
| Loneliness (UCLA)      | 5.14  | 1.63 | 3    | 9    |
| Social Support (ESSI)  | 21.67 | 3.54 | 5    | 25   |
| Stress (PSS-4)         | 5.46  | 2.43 | 0    | 15   |
| Resilience (BRS)       | 3.35  | 0.68 | 1.33 | 5.00 |

*Notes.* SD, standard deviation; Min., minimum value; Max., maximum value; PHQ-9, Patient-Health-Questionnaire-9; GAD-7, Generalized Anxiety Disorder scale; AUDIT-C, Alcohol Use Disorder Identification Test; UCLA 3, 3-item Loneliness Scale; ESSI, ENRICH Social Support Inventory; PSS-4, Perceived Stress Scale, BRS, Brief Resilience Scale.

**Supplementary Table S6.** Help-seeking intentions for No-Symptoms - Group (n = 1,971)

|                                        | Mean | SD   | Min. | Max. |
|----------------------------------------|------|------|------|------|
| Online services                        | 2.21 | 1.09 | 1    | 4    |
| Inpatient treatment                    | 1.63 | 0.88 | 1    | 4    |
| Psychological/psychosocial counselling | 2.90 | 1.00 | 1    | 4    |
| Psychotherapy                          | 2.91 | 1.05 | 1    | 4    |
| Psychiatrist                           | 2.44 | 1.09 | 1    | 4    |

*Notes.* SD, standard deviation; Min., minimum value; Max., maximum value; PHQ-9, Patient-Health-Questionnaire-9; GAD-7, Generalized Anxiety Disorder scale; AUDIT-C, Alcohol Use Disorder Identification Test; UCLA 3, 3-item Loneliness Scale; ESSI, ENRICH Social Support Inventory; PSS-4, Perceived Stress Scale, BRS, Brief Resilience Scale.
